# Supplementary material for: Temporal and spatial variation of potassium balance in agricultural land at national and regional levels in China
Source: PubMed Central journal article supplement (PMC5584956; doi:10.1371/journal.pone.0184156), 2017-09-05
Supplement: pone.0184156.s001.pdf [file pone.0184156.s001.pdf]

**S1 Table The proportion K<sub>2</sub>O fertilizer in compound fertilizer at six regions in China.**

| Regions   | NE             | NC                             | NW                            | MLYR                               | SE                   | SW                        |
|-----------|----------------|--------------------------------|-------------------------------|------------------------------------|----------------------|---------------------------|
| Provinces | HLJ, JL,<br>LN | BJ, HEB,<br>HEN, SD,<br>SX, TJ | GS, NMG,<br>NX, QH,<br>SNX,XJ | AH, HUB,<br>HUN, JS,<br>JX, SH, ZJ | FJ, GD,<br>GX,<br>HN | CQ, GZ,<br>SC, XZ,<br>YN, |
| 1980      | 1:3.60:0.12    | 1:2.70:0.25                    |                               |                                    | 1:1.80:0.49          |                           |
| 1981      | 1:3.54:0.13    | 1:2.66:0.25                    |                               |                                    | 1:1.77:0.50          |                           |
| 1982      | 1:3.94:0.09    | 1:2.96:0.19                    |                               |                                    | 1:1.97:0.37          |                           |
| 1983      | 1:4.04:0.09    | 1:3.03:0.17                    |                               |                                    | 1:2.02:0.34          |                           |
| 1984      | 1:4.26:0.07    | 1:3.20:0.14                    |                               |                                    | 1:2.13:0.27          |                           |
| 1985      | 1:4.04:0.09    | 1:3.03:0.18                    |                               |                                    | 1:2.02:0.35          |                           |
| 1986      | 1:3.94:0.08    | 1:2.96:0.16                    |                               |                                    | 1:1.97:0.31          |                           |
| 1987      | 1:3.90:0.08    | 1:2.93:0.16                    |                               |                                    | 1:1.95:0.32          |                           |
| 1988      | 1:4.28:0.06    | 1:3.21:0.12                    |                               |                                    | 1:2.14:0.24          |                           |
| 1989      | 1:4.14:0.07    | 1:3.11:0.14                    |                               |                                    | 1:2.07:0.27          |                           |
| 1990      | 1:4.02:0.08    | 1:3.02:0.16                    |                               |                                    | 1:2.01:0.31          |                           |
| 1991      | 1:2.18:0.17    | 1:1.64:0.35                    |                               |                                    | 1:1.09:0.69          |                           |
| 1992      | 1:2.16:0.17    | 1:1.62:0.35                    |                               |                                    | 1:1.08:0.69          |                           |
| 1993      | 1:1.98:0.18    | 1:1.49:0.36                    |                               |                                    | 1:0.99:0.72          |                           |
| 1994      | 1:1.92:0.19    | 1:1.44:0.37                    |                               |                                    | 1:0.96:0.74          |                           |
| 1995      | 1:1.98:0.18    | 1:1.49:0.36                    |                               |                                    | 1:0.99:0.72          |                           |
| 1996      | 1:2.18:0.17    | 1:1.64:0.35                    |                               |                                    | 1:1.09:0.69          |                           |
| 1997      | 1:2.26:0.17    | 1:1.70:0.34                    |                               |                                    | 1:1.13:0.67          |                           |
| 1998      | 1:2.16:0.17    | 1:1.62:0.35                    |                               |                                    | 1:1.08:0.69          |                           |
| 1999      | 1:2.14:0.18    | 1:1.61:0.35                    |                               |                                    | 1:1.07:0.70          |                           |
| 2000      | 1:2.02:0.18    | 1:1.52:0.36                    |                               |                                    | 1:1.01:0.72          |                           |
| 2001      | 1:2.06:0.18    | 1:1.55:0.36                    |                               |                                    | 1:1.03:0.71          |                           |
| 2002      | 1:2.14:0.17    | 1:1.61:0.35                    |                               |                                    | 1:1.07:0.69          |                           |
| 2003      | 1:2.00:0.18    | 1:1.50:0.36                    |                               |                                    | 1:1:0.72             |                           |
| 2004      | 1:2.26:0.20    | 1:1.70:0.40                    |                               |                                    | 1:1.13:0.79          |                           |
| 2005      | 1:2.20:0.19    | 1:1.65:0.38                    |                               |                                    | 1:1.10:0.76          |                           |
| 2006-2015 | 1:2:0.2        | 1:1.5:0.4                      |                               |                                    | 1:1:0.80             |                           |

<sup>a</sup> From: Yan (2008); Li and Jin (2011)

<sup>b</sup> Six regions were grouped based on geographical locations and China's administrative divisions (Li and Jin, 2011). NE, northeast; NC, north central; NW, northwest; MLYR, the middle and lower reaches of the Yangtze River; SE, southeast; SW, southwest. AH, Anhui; BJ, Beijing; CQ, Chongqing; FJ, Fujian; GD, Guangdong; GS, Gansu;

GX, Guangxi; GZ, Guizhou; HEB, Hebei; HEN, Henan; HLJ, Heilongjiang; HN, Hainan; HUB, Hubei; HUN, Hunan; JL, Jilin; JS, Jiangsu; JX, Jiangxi; LN, Liaoning; IM, Inner Mongolia; NX, Ningxia; QH, Qinghai; SC, Sichuan; SD, Shandong; SH, Shanghai; SNX, Shaanxi; SX, Shanxi; TB, Tibet; TJ, Tianjin; XJ, Xinjiang; YN, Yunnan; ZJ, Zhejiang. The above provinces don't include Hong Kong, Macao and Taiwan. CQ was started from 1997.
