# Supplementary material for: Temporal and spatial variation of potassium balance in agricultural land at national and regional levels in China
Source: PubMed Central journal article supplement (PMC5584956; doi:10.1371/journal.pone.0184156), 2017-09-05
Supplement: pone.0184156.s002.pdf [file pone.0184156.s002.pdf]

**S2 Table The cake production rate of different crops and the K content in the cake manure.**

| Crops          | Cake rate <sup>a</sup> | Content <sup>b</sup> (%) |
|----------------|------------------------|--------------------------|
| Beans          | 0.85                   | 1.434                    |
| Peanut         | 0.5                    | 1.157                    |
| Rapeseed       | 0.55                   | 1.253                    |
| Sunflower seed | 0.7                    | 1.591                    |
| Cotton seeds   | 0.8                    | 0.916                    |
| Sesame seeds   | 0.5                    | 0.675                    |
| Flax           | 0.7                    | 1.326                    |

<sup>a</sup> From: Zhang et al. (2010b)

<sup>b</sup> From: China Agric. Press (1999a)
