# Supplementary material for: Temporal and spatial variation of potassium balance in agricultural land at national and regional levels in China
Source: PubMed Central journal article supplement (PMC5584956; doi:10.1371/journal.pone.0184156), 2017-09-05
Supplement: pone.0184156.s003.pdf [file pone.0184156.s003.pdf]

**S3 Table Other input resources (deposition, irrigation and seeds) and loss rate****(leaching and runoff).**

| Item                           | Unit                                    | NE   | NC  | NW  | MLYR | SE  | SW   |
|--------------------------------|-----------------------------------------|------|-----|-----|------|-----|------|
| Deposition <sup>1</sup>        | (kg K <sub>2</sub> O ha <sup>-1</sup> ) | 8.2  | 5.3 | 6.7 | 4.5  | 4.4 | 6.8  |
| Irrigation <sup>1</sup>        | (kg K <sub>2</sub> O ha <sup>-1</sup> ) | 4.3  | 5.8 | 6   | 5.3  | 4   | 3.2  |
| Seeds <sup>1</sup>             | (kg K <sub>2</sub> O ha <sup>-1</sup> ) | 0.79 | 0.6 | 1.0 | 0.43 | 0.2 | 0.68 |
| Leaching & runoff <sup>1</sup> | (kg K <sub>2</sub> O ha <sup>-1</sup> ) | 1.0  | 0.1 | 0.1 | 4.0  | 3.7 | 2.0  |

<sup>a</sup> Li and Jin (2011)
